# Supplementary material for: DsbA-L deficiency in T cells promotes diet-induced thermogenesis through suppressing IFN-γ production
Source: PubMed Central journal article supplement (PMC7804451; doi:10.1038/s41467-020-20665-4), 2021-01-12
Supplement: 41467_2020_20665_MOESM1_ESM.pdf [file 41467_2020_20665_MOESM1_ESM.pdf]

## Supplementary information

### **DsbA-L Deficiency in T cells Promotes Diet-induced Thermogenesis through Suppressing IFN- $\gamma$ Production**

Haiyan Zhou, Xinyi Peng, Jie Hu, Liwen Wang, Hairong Luo, Junyan Zhang, Yacheng Zhang, Guobao Li, Yujiao Ji, Jingjing Zhang, Juli Bai, Meilian Liu, Zhiguang Zhou, Feng Liu

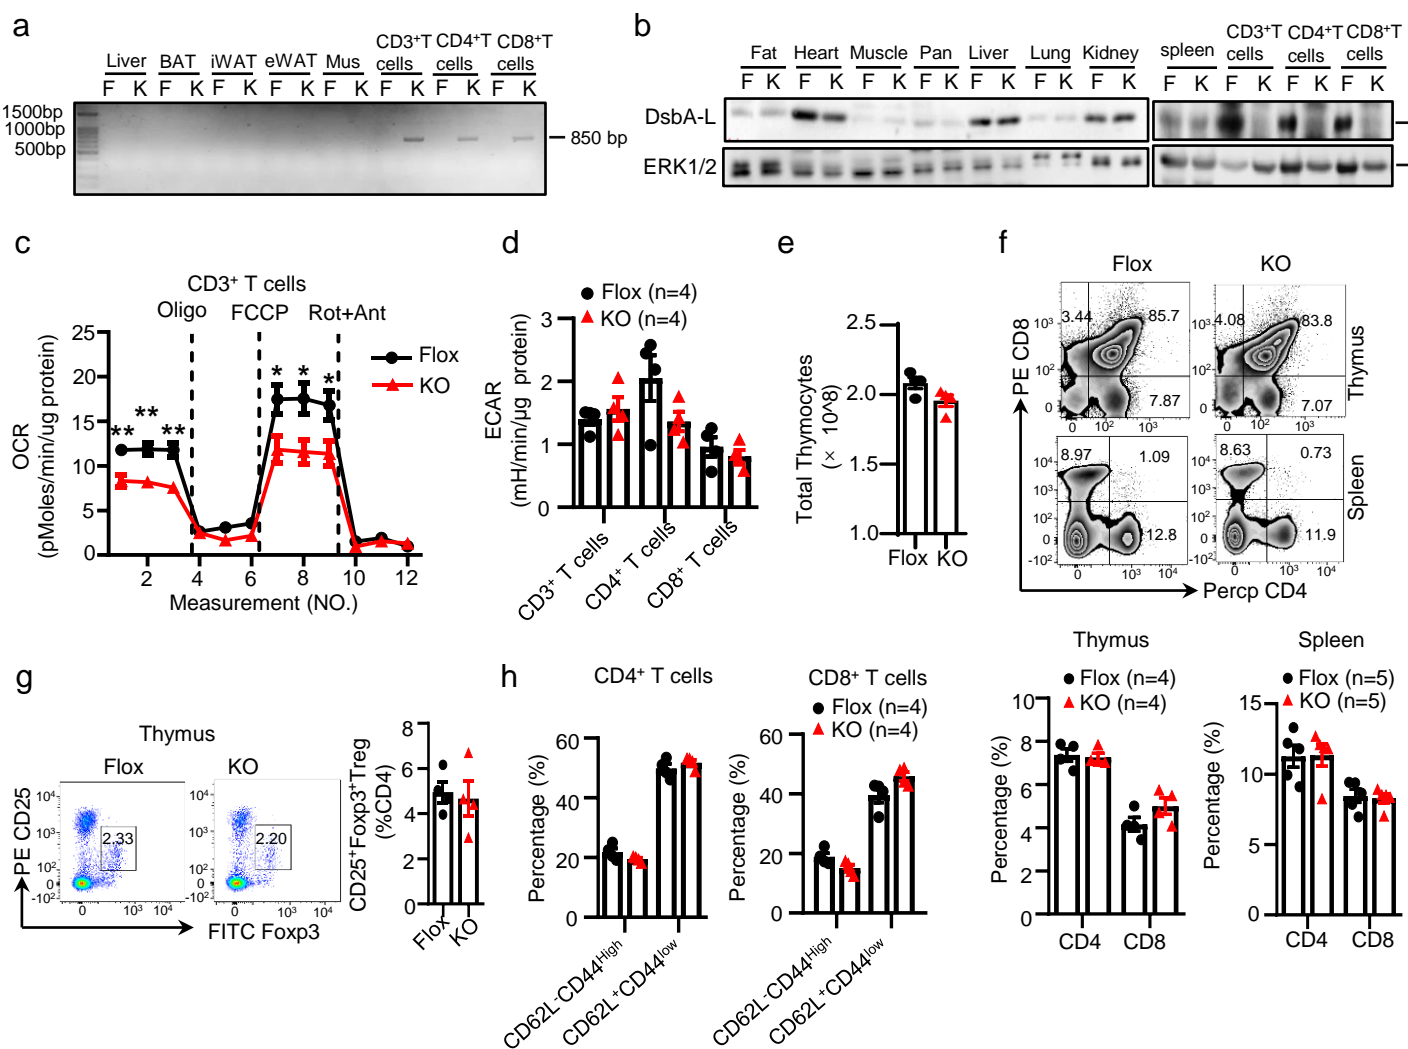

**Supplementary Figure 1 T cell-specific DsbA-L deficiency has no effect on T cell development. (Related to Fig.2).**

(a) DNA was extracted from tissues and cells of DsbA-L<sup>CD4-KO</sup> mice and control littermates. PCR was performed to confirm successful loxP site recombination mediated by Cre with primers as follows: Fw: CTGGATGGCTTCTGTTAGAG; Rv: GGATGGAGGACCGTGTTCATC. Mus: muscle.

(b) Protein levels of DsbA-L in tissues and cells collected from 8-week-old DsbA-L<sup>CD4-KO</sup> mice and control littermates. Pan: pancreas.

(c) OCR of activated CD3<sup>+</sup> T cells was measured under basal conditions and in response to indicated drugs. (n=4/group). Oligo, oligomycin; Rot, rotenone; Ant, antimycin.

(d) ECAR of activated CD3<sup>+</sup>, CD4<sup>+</sup>, and CD8<sup>+</sup> T cells were measured under basal conditions. (n=4/group)

(e) Total thymocytes in 8-week-old DsbA-L<sup>CD4-KO</sup> mice and control littermates. (n=4/group)

(f) Frequencies of CD4<sup>+</sup> and CD8<sup>+</sup> T cells in thymus (n=4/group) and spleen (n=5/group) of 8-week-old DsbA-L<sup>CD4-KO</sup> mice and control littermates.

(g) Treg development in the thymus of DsbA-L<sup>CD4-KO</sup> mice and control littermates. (n=4/group)

(h) Frequencies of CD62L<sup>+</sup>CD44<sup>Low</sup> naive T cells and CD62L<sup>-</sup>CD44<sup>High</sup> memory T cells in CD4<sup>+</sup> and CD8<sup>+</sup> T cells in spleen of 8-week-old DsbA-L<sup>CD4-KO</sup> mice and control littermates. (n=4/group)

Data shown are representative of three independent experiments. All data are presented as mean ± SEM.

Statistical values p < 0.05 (\*), p < 0.01 (\*\*), p < 0.001 (\*\*\*) are determined by two-tailed unpaired Student's t test.

Source data are provided as a Source Data File.

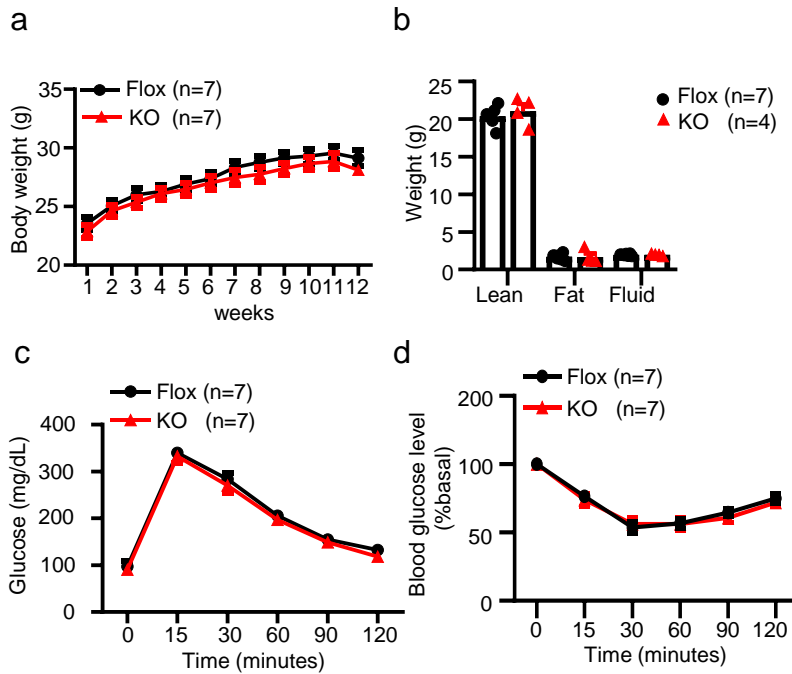

**Supplementary Figure 2 Metabolic phenotypes of DsbA-L<sup>CD4-KO</sup> mice and control littermates under ND or HFD feeding conditions (Related to Fig.3).**

- (a) Body weight gain of DsbA-L<sup>CD4-KO</sup> mice (n=7) and control littermates (n=7) during ND feeding.
- (b) Body composition of DsbA-L<sup>CD4-KO</sup> mice (n=7) and control littermates (n=4) fed a ND for 12 weeks.
- (c) Glucose tolerance test was performed on DsbA-L<sup>CD4-KO</sup> mice (n=7) and control littermates (n=7) fed a ND for 12 weeks.
- (d) Insulin tolerance test was performed on DsbA-L<sup>CD4-KO</sup> mice (n=7) and control littermates (n=7) fed a ND for 12 weeks.

Data shown are representative of three independent experiments. All data are presented as mean  $\pm$  SEM.

Source data are provided as a Source Data File.

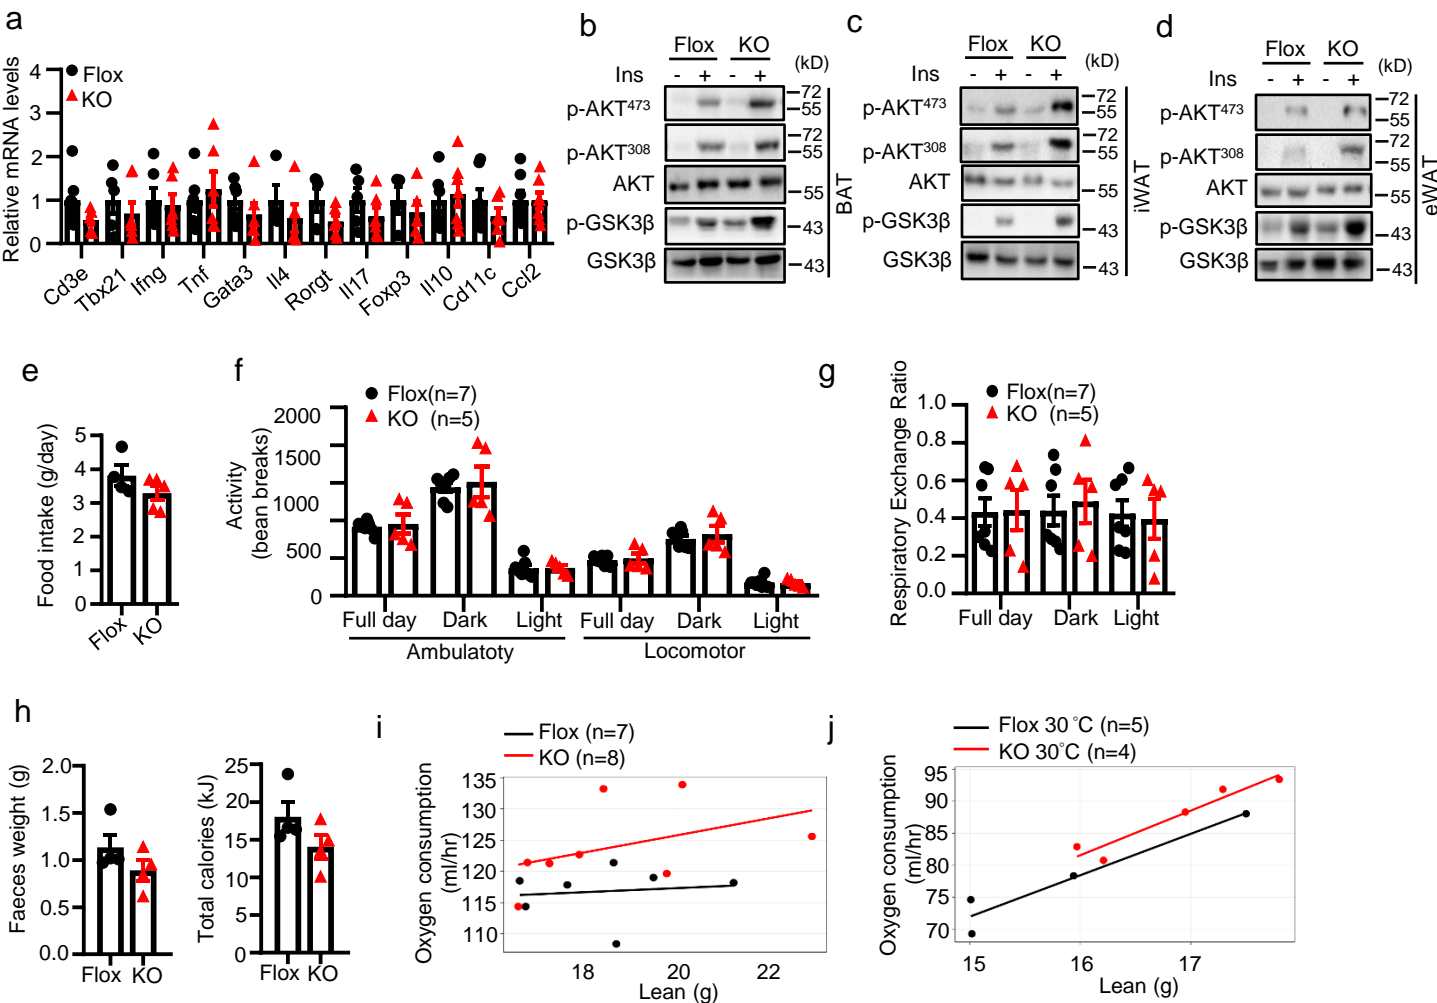

**Supplementary Figure 3 Metabolic Phenotypes of DsbA-L<sup>CD4-KO</sup> mice and control littermates under HFD feeding conditions (Related to Fig.3 and Fig.4).**

- (a) Inflammation in the eWAT of DsbA-L<sup>CD4-KO</sup> mice (n=5-7) and control littermates (n=4-7) fed a HFD for 12 weeks.
- (b-d) Insulin signaling was examined in BAT (b), iWAT (c), and eWAT (d) of DsbA-L<sup>CD4-KO</sup> mice and control littermates fed a HFD for 12 weeks. Ins, insulin.
- (e) Food intake in DsbA-L<sup>CD4-KO</sup> mice (n=5) and control littermates (n=4) fed a HFD for 12 weeks.
- (f) Physical Activity in DsbA-L<sup>CD4-KO</sup> mice (n=5) and control littermates (n=7) fed a HFD for 12 weeks.
- (g) RER in DsbA-L<sup>CD4-KO</sup> mice (n=5) and control littermates (n=7) fed a HFD for 12 weeks.
- (h) Dried faeces weights and total faeces energy in DsbA-L<sup>CD4-KO</sup> mice (n=4) and control littermates (n=4) fed a HFD for 12 weeks.
- (i) ANCOVA analyses of average VO<sub>2</sub> (ml/hr) by lean mass in DsbA-L<sup>CD4-KO</sup> mice and control littermates fed a HFD for 5 weeks.
- (j) ANCOVA analyses of average VO<sub>2</sub> (ml/hr) by lean mass in DsbA-L<sup>CD4-KO</sup> mice and control littermates which were fed a HFD for 5 weeks and then tested under thermoneutral conditions (30°C).

Data shown are representative of three independent experiments. All data are presented as mean  $\pm$  SEM.

Source data are provided as a Source Data File.

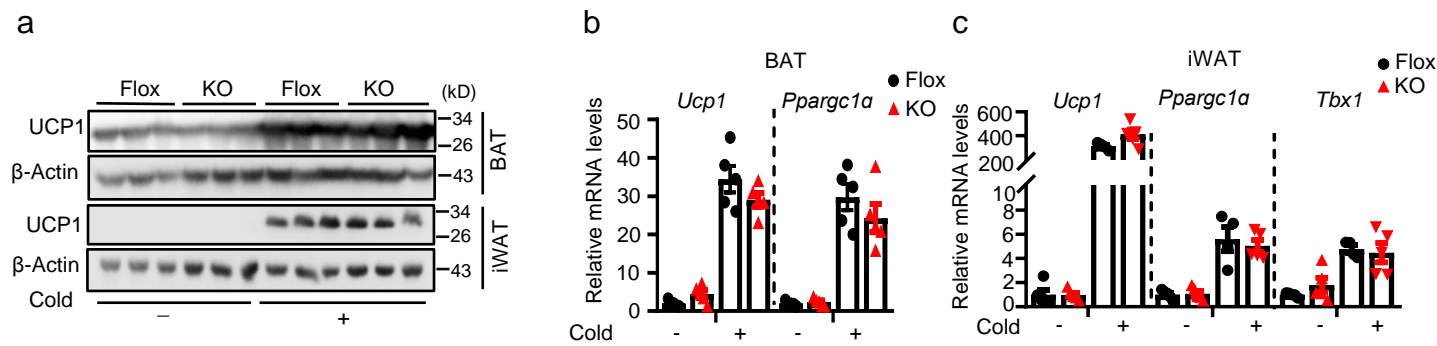

**Supplementary Figure 4 DsbA-L deficiency in T cells has no significant effect on CIT (Related to Fig.4).**

(a) Western blot analyses of UCP1 levels in the BAT and iWAT of DsbA-L<sup>CD4-KO</sup> mice and control littermates after cold stimulation.

(b and c) mRNA levels of thermogenic and beige marker genes in the BAT (n=5/group) (b) and iWAT (n=4-5/group)

(c) of DsbA-L<sup>CD4-KO</sup> mice and control littermates after cold stimulation.

Data shown are representative of three independent experiments. All data are presented as mean  $\pm$  SEM. Source data are provided as a Source Data File.

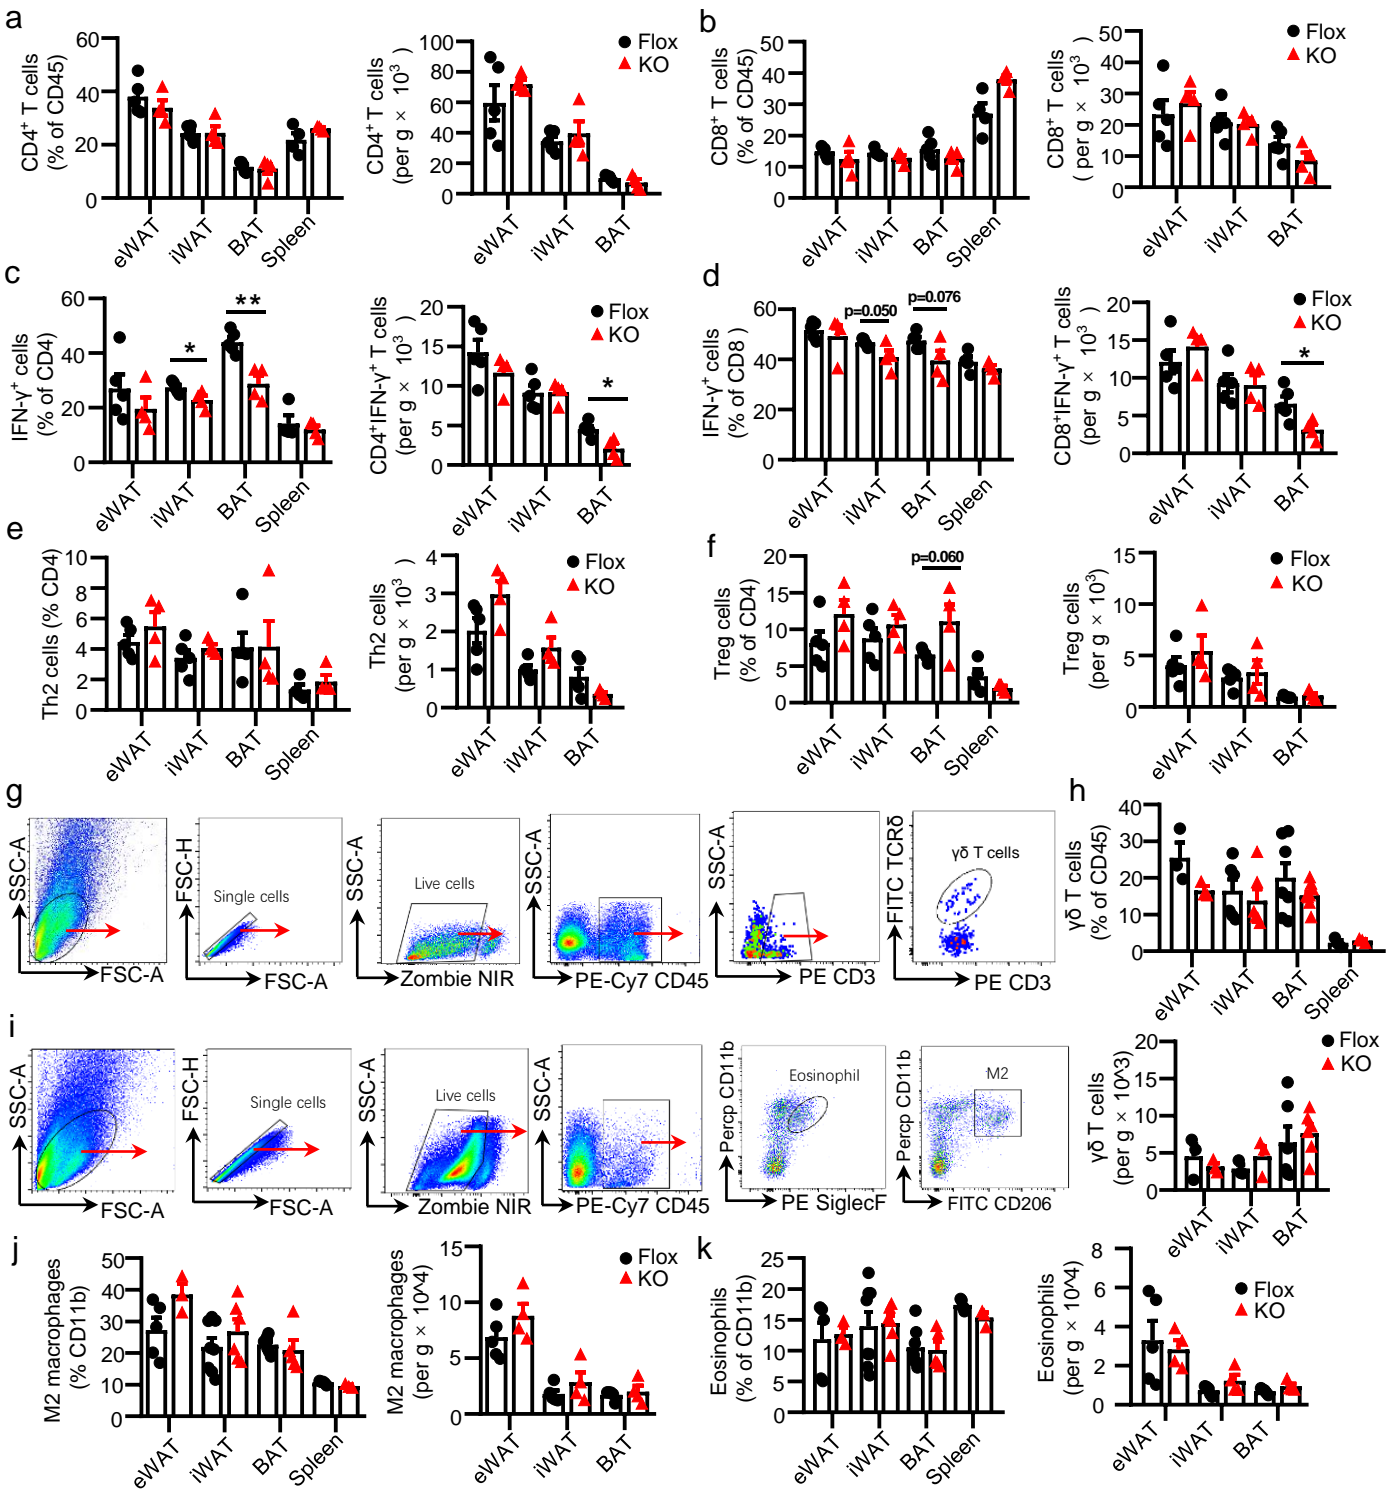

**Supplementary Figure 5 T cell phenotypes in the adipose tissues of DsbA-L<sup>CD4-KO</sup> mice and control littermates fed a HFD for 5 weeks and 12 weeks (Related to Fig.5).**

(a and b) Quantification of the frequencies and total numbers of CD4<sup>+</sup> (a) and CD8<sup>+</sup> (b) T cells in the eWAT, iWAT, BAT, and spleen of DsbA-L<sup>CD4-KO</sup> mice (n=4) and control littermates (n=5) fed a HFD for 12 weeks.

(c-f) Quantification of the frequencies and total numbers of CD4<sup>+</sup>IFN- $\gamma$ <sup>+</sup> Th1 cells (c), CD8<sup>+</sup>IFN- $\gamma$ <sup>+</sup> T cells (d), Th2 cells (e), and Treg cells (f) in the eWAT, iWAT, BAT, and spleen of DsbA-L<sup>CD4-KO</sup> mice (n=4) and control littermates (n=5) fed a HFD for 12 weeks.

(g) Gating strategies of  $\gamma\delta$  T cells in the adipose tissues.

(h) Quantification of the frequencies and total numbers of  $\gamma\delta$  T cells in the eWAT, iWAT, BAT, and spleen of DsbA-L<sup>CD4-KO</sup> mice and control littermates fed a HFD for 5 weeks. (n=3-9/group)

(i) Gating strategies of M2 macrophages and eosinophils in the adipose tissues.

(j and k) Quantification of the frequencies and total numbers of M2 macrophages (j) and eosinophils (k) in the eWAT, iWAT, BAT, and spleen of DsbA-L<sup>CD4-KO</sup> mice and control littermates fed a HFD for 5 weeks. (n=3-8/group)

Data shown are representative of three independent experiments. All data are presented as mean  $\pm$  SEM. Statistical values  $p < 0.05$  (\*),  $p < 0.01$  (\*\*),  $p < 0.001$  (\*\*\*) are determined by two-tailed unpaired Student's t test. Source data are provided as a Source Data File.

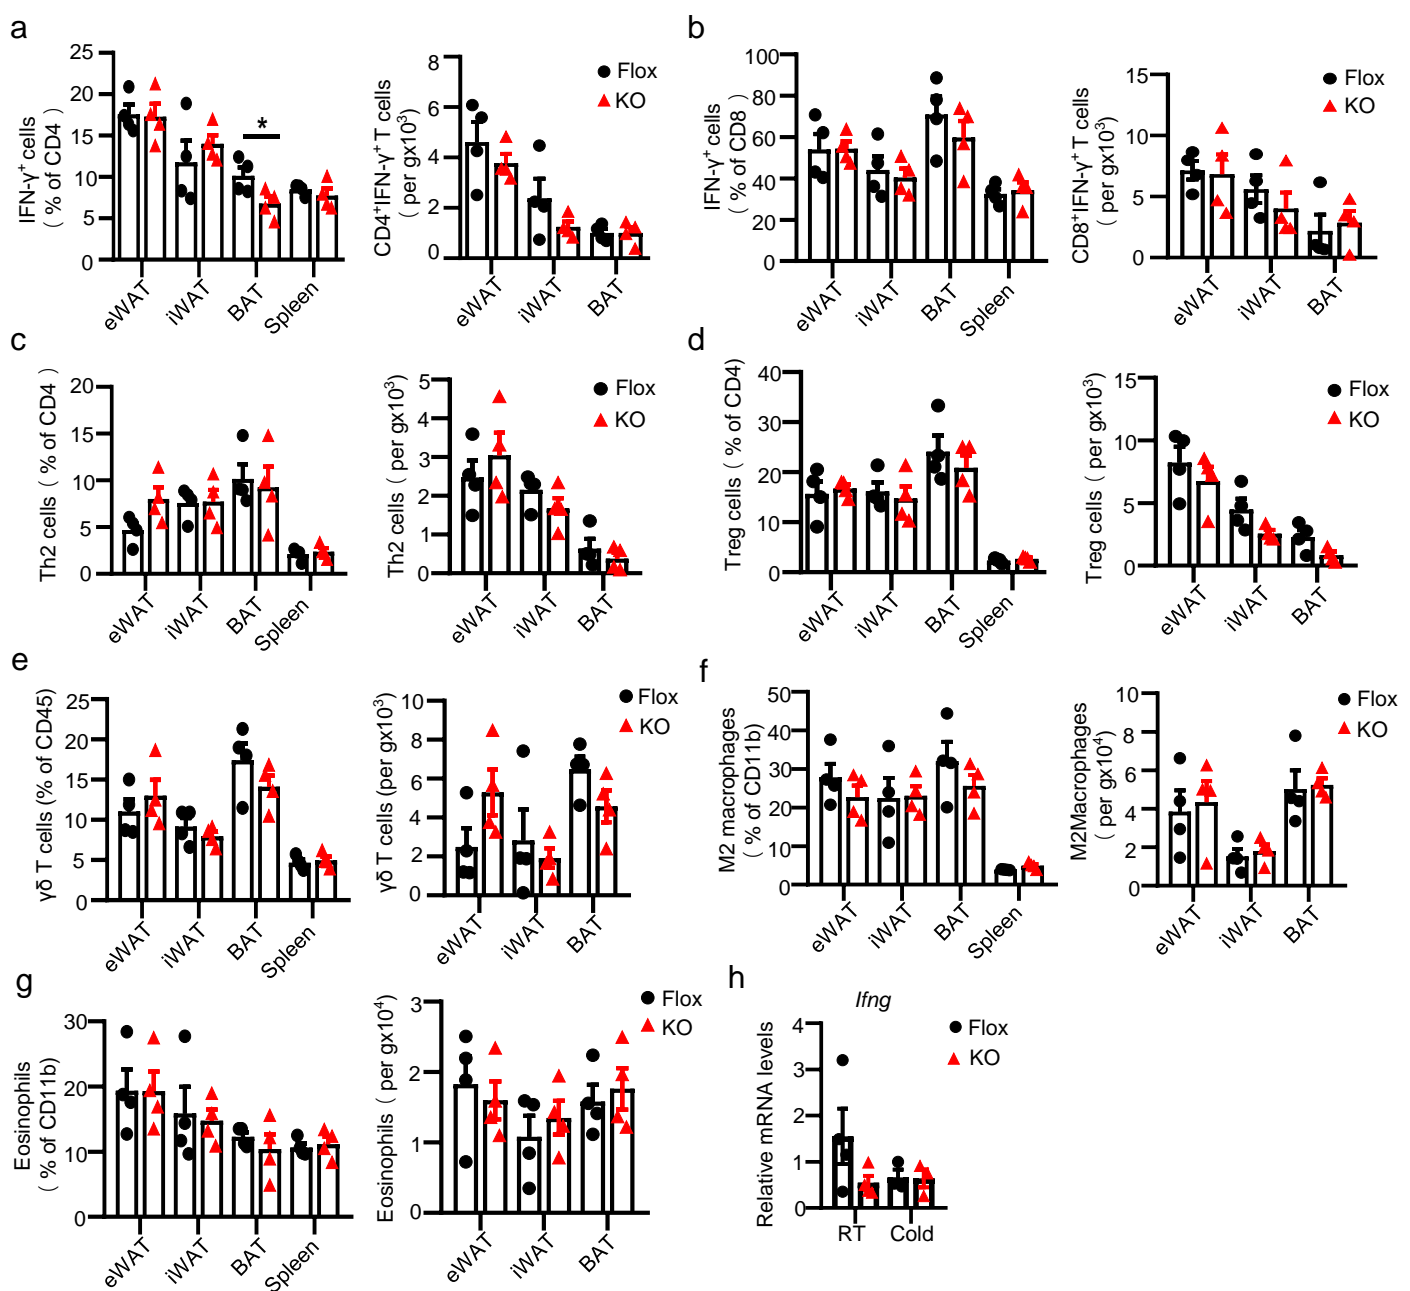

**Supplementary Figure 6 T cell phenotypes in the adipose tissues of DsbA-L<sup>CD4-KO</sup> mice and control littermates after cold stimulation (Related to Fig.5)**

8-week-old DsbA-L<sup>CD4-KO</sup> mice (n=4) and control littermates (n=4) were exposed to cold stimulation for 1 week.

(a-e) Quantification of the frequencies and total numbers of CD4<sup>+</sup>IFN- $\gamma$ <sup>+</sup> Th1 cells (a), CD8<sup>+</sup>IFN- $\gamma$ <sup>+</sup> T cells (b), Th2 cells (c), Treg cells (d), and  $\gamma\delta$  T cells (e) in the eWAT, iWAT, BAT, and spleen.

(f and g) Quantification of the frequencies and total numbers of M2 macrophages (f) and eosinophils (g) in the eWAT, iWAT, BAT, and spleen.

(h) IFN- $\gamma$  mRNA levels in the BAT of 8-week-old DsbA-L<sup>CD4-KO</sup> mice and control littermates with or without cold stimulation. RT: room temperature.

Data shown are representative of three independent experiments. All data are presented as mean  $\pm$  SEM.

Statistical values  $p < 0.05$  (\*),  $p < 0.01$  (\*\*),  $p < 0.001$  (\*\*\*) are determined by two-tailed unpaired Student's t test.

Source data are provided as a Source Data File.

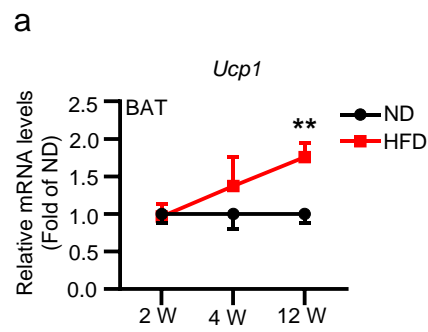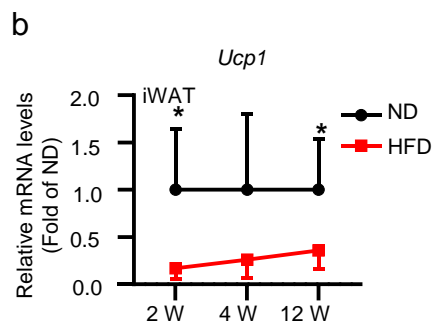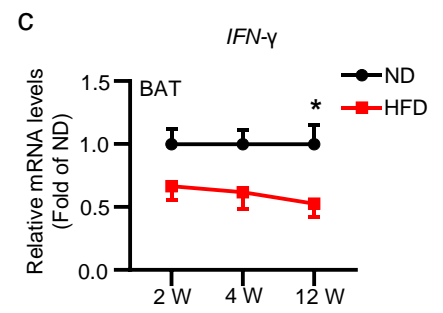

**Supplementary Figure 7 IFN- $\gamma$  expression negatively correlates with UCP1 expression in BAT after HFD feeding (Related to Fig.6).**

Six-week-old C57BL/6 mice (n=6/group) were fed a ND or HFD for 2, 4, or 12 weeks.

(a) *Ucp1* mRNA levels in BAT of mice fed a ND or HFD.

(b) *Ucp1* mRNA levels in iWAT of mice fed a ND or HFD.

(c) IFN- $\gamma$  mRNA levels in BAT of mice fed a ND or HFD.

Data shown are representative of at least three independent experiments. All data are presented as mean  $\pm$  SEM.

Statistical values  $p < 0.05$  (\*),  $p < 0.01$  (\*\*),  $p < 0.001$  (\*\*\*) are determined by two-tailed unpaired Student's t test.

Source data are provided as a Source Data File.



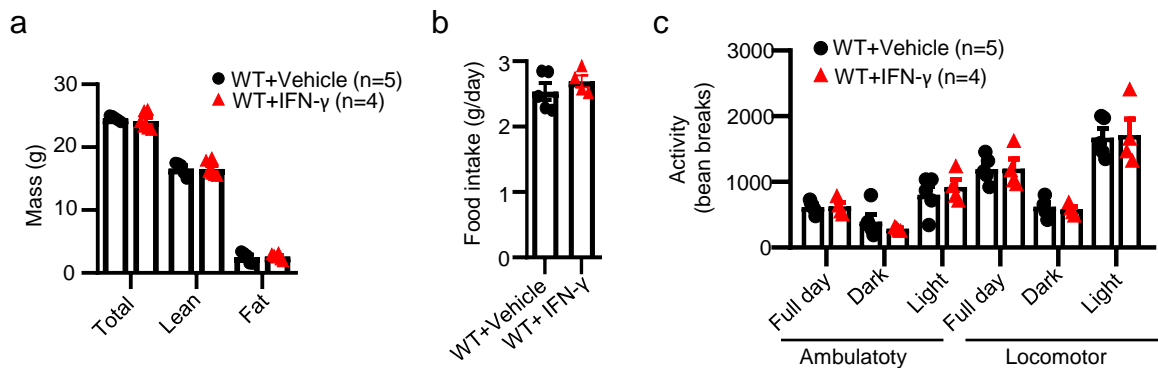

**Supplementary Figure 8 Metabolic phenotypes of wild-type mice fed a HFD for 5 weeks and treated with or without IFN- $\gamma$  for the last week (Related to Fig.7).**

Body weights and fat mass (a), food intake (b), as well as physical activity (c) of wild-type mice fed a HFD for 5 weeks with (n=4) or without IFN- $\gamma$  (n=5) administration for the last week.

Data shown are representative of three independent experiments. All data are presented as mean  $\pm$  SEM.

Source data are provided as a Source Data File.

**Supplementary Table 1: Primer pairs sequences for qPCR analysis**

| Gene     | Primers        | Sequences                |
|----------|----------------|--------------------------|
| DsbA-L   | Forward primer | GCAGTTGCGGCCCACTT        |
|          | Reverse primer | TGGTTGGTTTCCGCTGTCTT     |
| Prdm16   | Forward primer | TGAGGAAGCATTGGAAGTTAAAG  |
|          | Reverse primer | GTTCTTAGCCTGCCTGTAC      |
| Ppargc1a | Forward primer | CCGAAGACACTACAGGTTCCATAG |
|          | Reverse primer | GGGAGGGAGAGAGGAGAGAGG    |
| Ucp1     | Forward primer | AAGACAGAAGAGCATAGCATTAC  |
|          | Reverse primer | CCAGTCATACACTCCCACCTC    |
| Cebpb    | Forward primer | CCAAGGCCAAGGCCAAGAAGAC   |
|          | Reverse primer | ACAAGTTCCGCAGGGTGTGAG    |
| Cidea    | Forward primer | TGCTCTTCTGTATCGCCAGT     |
|          | Reverse primer | GCCGTGTTAAGGAATCTGCTG    |
| Dio2     | Forward primer | CAGTGTGGTGCACGTCTCCAATC  |
|          | Reverse primer | TGAACCAAAGTTGACCACCAG    |
| Atg1     | Forward primer | GCTGTGGAATGAGGACATAGGA   |
|          | Reverse primer | GCATAGTGAGTGGCTGGTGAA    |
| Hsl      | Forward primer | TGTGTCAGTGCCTATTCAG      |
|          | Reverse primer | GAACAGCGAAGTGTCTCT       |
| Acc1     | Forward primer | TGCCACCACCTTATCACTATGTA  |
|          | Reverse primer | CCTGCCTGTCTCCATCCA       |
| Fasn     | Forward primer | TCGTCTATACCACTGCTTACTAC  |
|          | Reverse primer | ACACCACCTGAACCTGAG       |
| Il2      | Forward primer | GCAGGCCACAGAATTGAAAGA    |
|          | Reverse primer | TGCCGCAGAGGTCCAAGT       |
| Il5      | Forward primer | TGCACTTGAGTGTCTGACTCTCA  |
|          | Reverse primer | TGTGCTCATGGGAATCTCCAT    |
| Il6      | Forward primer | CCACGGCCTTCCCTACTTC      |
|          | Reverse primer | TTGGGAGTGGTATCCTCTGTGA   |
| Il10     | Forward primer | GATGCCCCAGGCAGAGAA       |
|          | Reverse primer | CACCCAGGGAATTCAAATGC     |
| Il13     | Forward primer | TTGAGGAGCTGAGCAACATCAC   |
|          | Reverse primer | CCATGCTGCCGTTGCA         |
| Ccl2     | Forward primer | GTCTGTGCTGACCCCAAGAAG    |
|          | Reverse primer | TGGTTCCGATCCAGGTTTTTA    |
| Ifng     | Forward primer | TTGGCTTGCAGCTTCTCT       |
|          | Reverse primer | TGACTGTGCCGTGGCAGTA      |
| Tgfb1    | Forward primer | GCAGTGGCTGAACCAAGGA      |
|          | Reverse primer | AGCAGTGAGCGCTGAATCG      |
| Cd3e     | Forward primer | CTCAGAAGCATGATAAGCAC     |
|          | Reverse primer | CAGAGTGATACAGATGTCAAC    |

|          |                |                         |
|----------|----------------|-------------------------|
| Gata3    | Forward primer | GACCCGAAACCGGAAGATGT    |
|          | Reverse primer | GCGCGTCATGCACCTTTT      |
| Foxp3    | Forward primer | GGCCCTTCTCCAGGACAGA     |
|          | Reverse primer | GGCATGGGCATCCACAGT      |
| Rorgt    | Forward primer | TGCGACTGGAGGACCTTCTAC   |
|          | Reverse primer | TCACCTCCTCCCGTGAAAAG    |
| Il17     | Forward primer | CCTGGCGGCTACAGTGAAG     |
|          | Reverse primer | TTTGGACACGCTGAGCTTTG    |
| Cd11c    | Forward primer | TGGGCCTGTCCCTTGCT       |
|          | Reverse primer | ACAGTAGGACCACAAGCCAACA  |
| Tbx21    | Forward primer | ACCTGTTGTGGTCCAAGTTCAA  |
|          | Reverse primer | GCCGTCCTTGCTTAGTGATGA   |
| 16s rRNA | Forward primer | CCGCAAGGGAAAGATGAAAGAC  |
|          | Reverse primer | TCGTTTGGTTTCGGGGTTTC    |
| mt-Atp6  | Forward primer | CACTATGAGCTGGAGCCGTAATT |
|          | Reverse primer | GAAGTGGCAAGTGAGCTTTTT   |
| Erra     | Forward primer | CGGTGTGGCATCCTGTGA      |
|          | Reverse primer | CTCCCCTGGATGGTCTCTT     |
| Aco2     | Forward primer | GCCCAGATGGCTATGCTACAG   |
|          | Reverse primer | CGCAGGTCTTTCTCACCCC     |
| Atp5a1   | Forward primer | TCTCCATGCCTCTAACACTCG   |
|          | Reverse primer | CCAGGTCAACAGACGTGTCAG   |
| Sdhb     | Forward primer | CTGAATAAGTGC GGACCTATGG |
|          | Reverse primer | AGTATTGCCTCCGTTGATGTTT  |
| Cpt1a    | Forward primer | AGATCAATCGGACCCTAGACAC  |
|          | Reverse primer | CAGCGAGTAGCGCATAGTCA    |
| Cpt2     | Forward primer | CAGCACAGCATCGTACCCA     |
|          | Reverse primer | TCCAATGCCGTTCTCAAAT     |
| Mcad     | Forward primer | ATGCCTGTGATTCTTGCTGGA   |
|          | Reverse primer | ACATCTTCTGGCCGTGATAAC   |
| Acox1    | Forward primer | CCGCCACCTTCAATCCAGAG    |
|          | Reverse primer | CAAGTTCTCGATTCTCGACGG   |
| Ppara    | Forward primer | TACTGCCGTTTTACAAGTGC    |
|          | Reverse primer | AGGTCGTGTTACAGGTAAGA    |
| Tbx1     | Forward primer | GGCAGGCAGACGAATGTTT     |
|          | Reverse primer | TGTGTCATCTACGGGCACAAAG  |
| Tmem26   | Forward primer | ACCCTGTCATCCCACAGAG     |
|          | Reverse primer | TGTTTGGTGGAGTCCTAAGGTC  |
| Klhl13   | Forward primer | GAACTGTGTATGGAGGAGTGATG |
|          | Reverse primer | GTTCTCGGAAATGGTTGCC     |
| Adrb3    | Forward primer | GACTACAGACCATAACCAACGTG |
|          | Reverse primer | CCTGGTGGCATTACGAGGA     |

|                |                |                          |
|----------------|----------------|--------------------------|
| Pde4a          | Forward primer | TCAGCGAGGAGGACACTCTTC    |
|                | Reverse primer | TTTCTGCCTCCAAGCTGACA     |
| Pde4b          | Forward primer | CAAACAAGGTAAGGACACCTCTT  |
|                | Reverse primer | TGGTAGCAAGGTACGAGCAAA    |
| Pde4d          | Forward primer | TTTCTTCCCGCAGCATTCA      |
|                | Reverse primer | GTCTGCTTGTTCCAACGTCTGA   |
| Th             | Forward primer | TCTCCTTGAGGGGTACAAAACC   |
|                | Reverse primer | ACCTCGAAGCGCACAAAGT      |
| $\beta$ -actin | Forward primer | GTTGGTTGGAGCAAACATC      |
|                | Reverse primer | CTTATTTTCATGGATACTTGAATG |
